# Supplementary material for: Solvent-free nanoparticle fluids with highly collective functionalities for layer-by-layer assembly
Source: Royal Society of Chemistry journal article supplement (doi:10.1039/c2jm30815k), 2012-01-01
Supplement: c2jm30815k.pdf [file c2jm30815k.pdf]

## Supporting Information

### Solvent-Free Nanoparticle Fluids with Highly Collective Functionalities for Layer-by-Layer Assembly

Younghoon Kim, Donghee Kim, Ilyoung Kwon, Hyun Wook Jung and Jinhan Cho\*

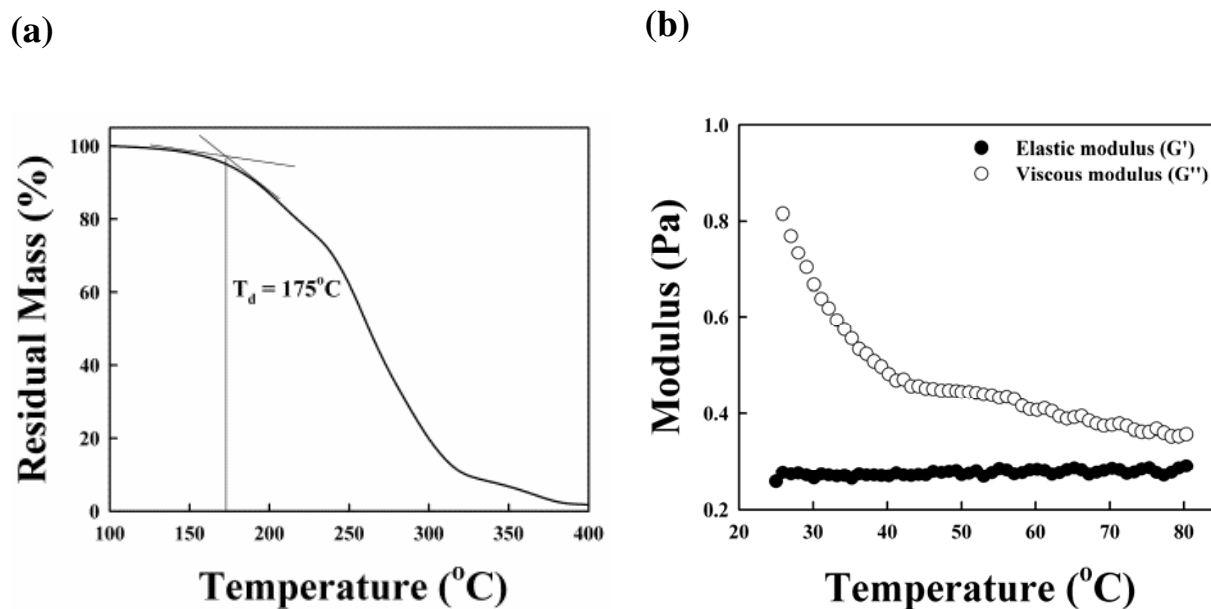

**Figure S1.** (a) Thermogravimetric Analysis (TGA) data of TFI-IL. (b) Temperature-dependent modulus data of TFI-IL.

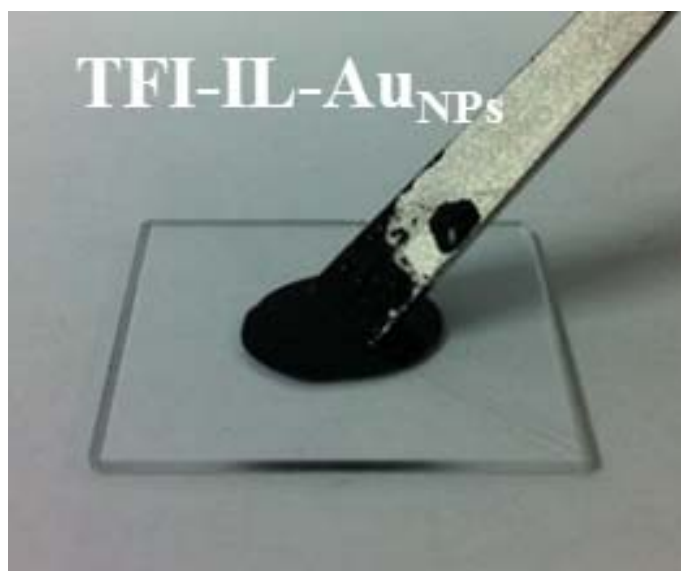

**Figure S2.** Photographic image of the highly concentrated TFI-IL-Au<sub>NP</sub> (60 wt%) fluid. The Au<sub>NP</sub> fluid was phase-transferred to TOABr-Au<sub>NPs</sub> dispersed in toluene.

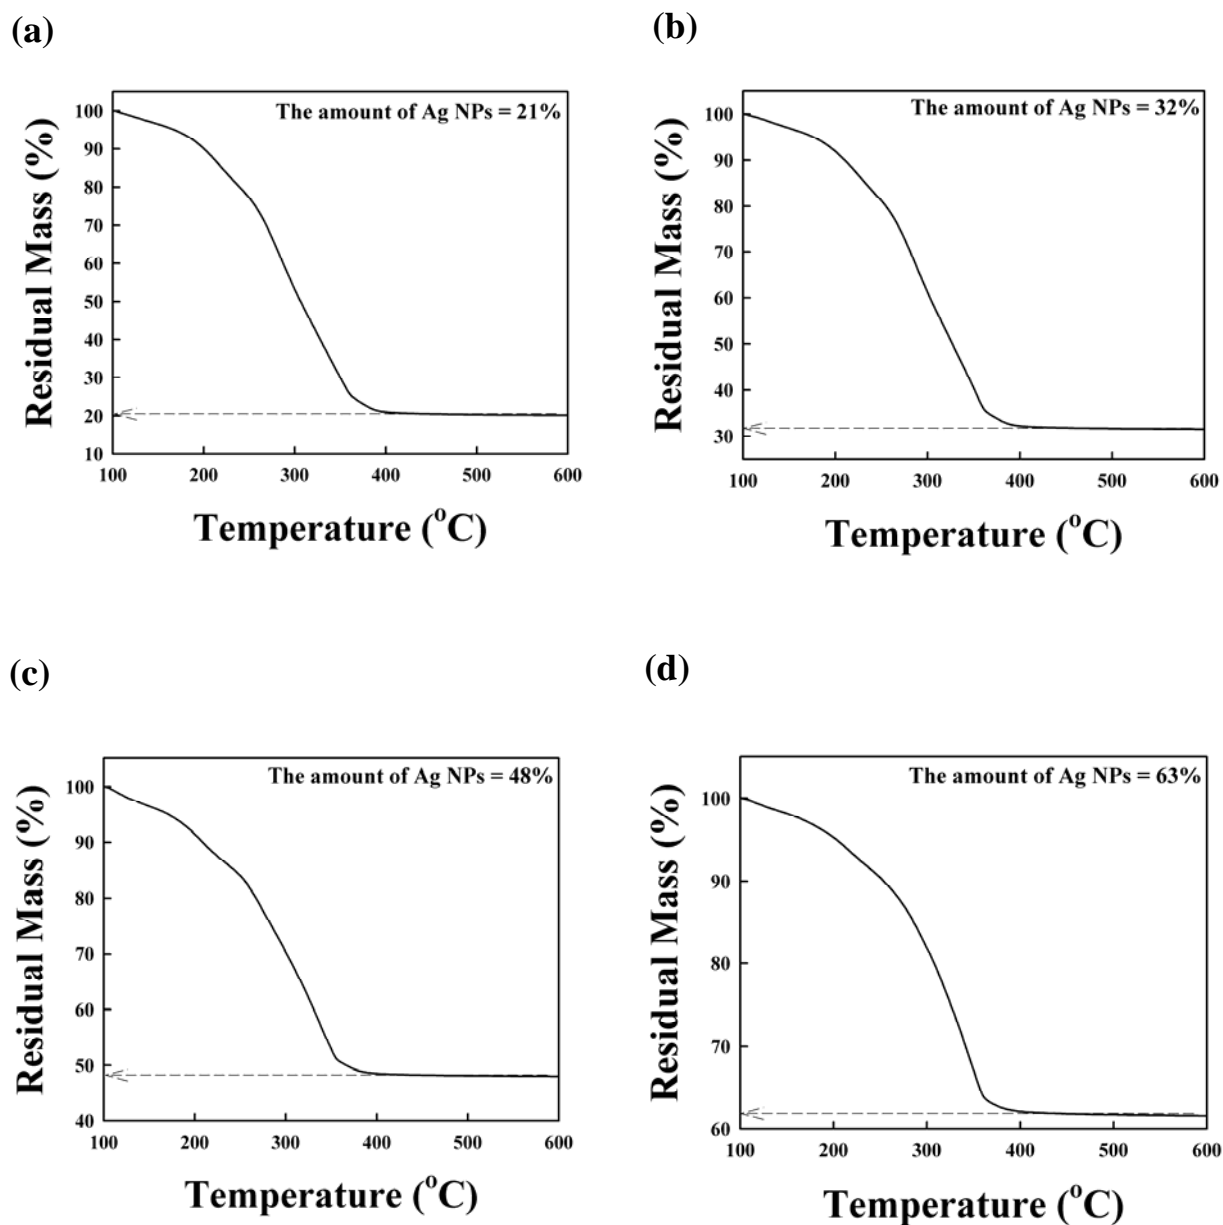

**Figure S3.** TGA data of each TFI-IL-Ag<sub>NP</sub> according to different ratio of TFI-IL: Ag<sub>NPs</sub> = (a) 1:0.25, (b) 1:0.5, (c) 1:1 and (d) 1:2, respectively.

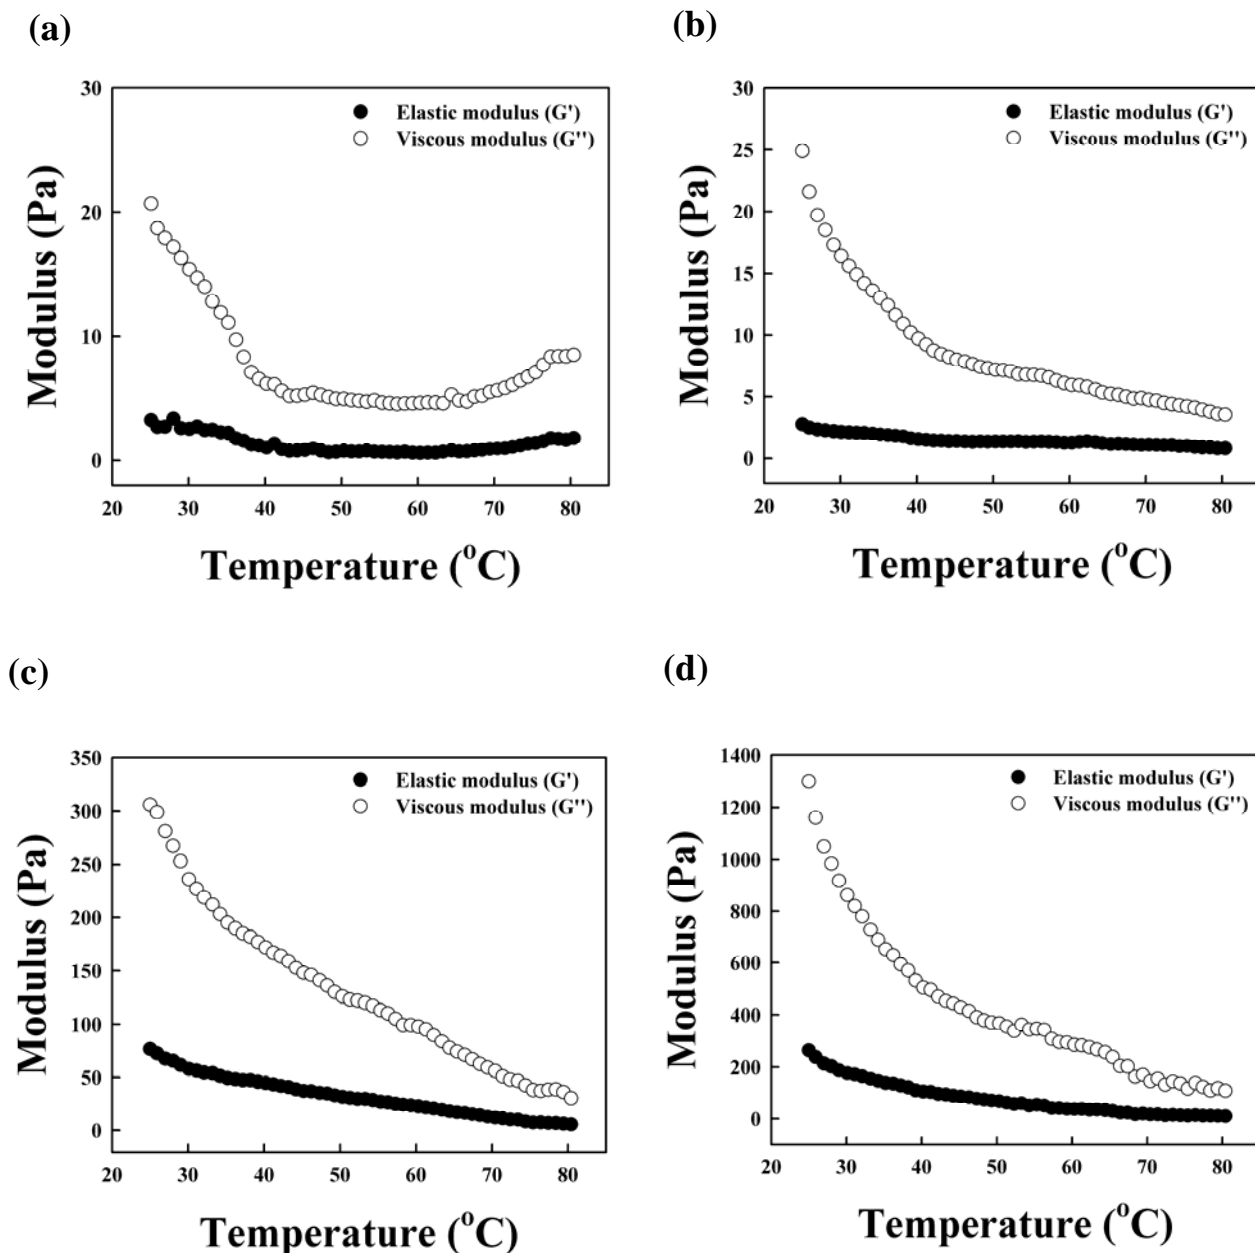

**Figure S4.** Effect of elastic ( $G'$ ) and viscous ( $G''$ ) moduli of each TFI-IL-Ag with the different contents of  $\text{Ag}_{\text{NPs}}$  on the temperature at fixed angular frequency ( $\omega = 1 \text{ s}^{-1}$ ) and strain amplitude ( $\gamma = 10\%$ ); (a) 21 wt%, (b) 32 wt%, (c) 48 wt% and (d) 63 wt%, respectively.

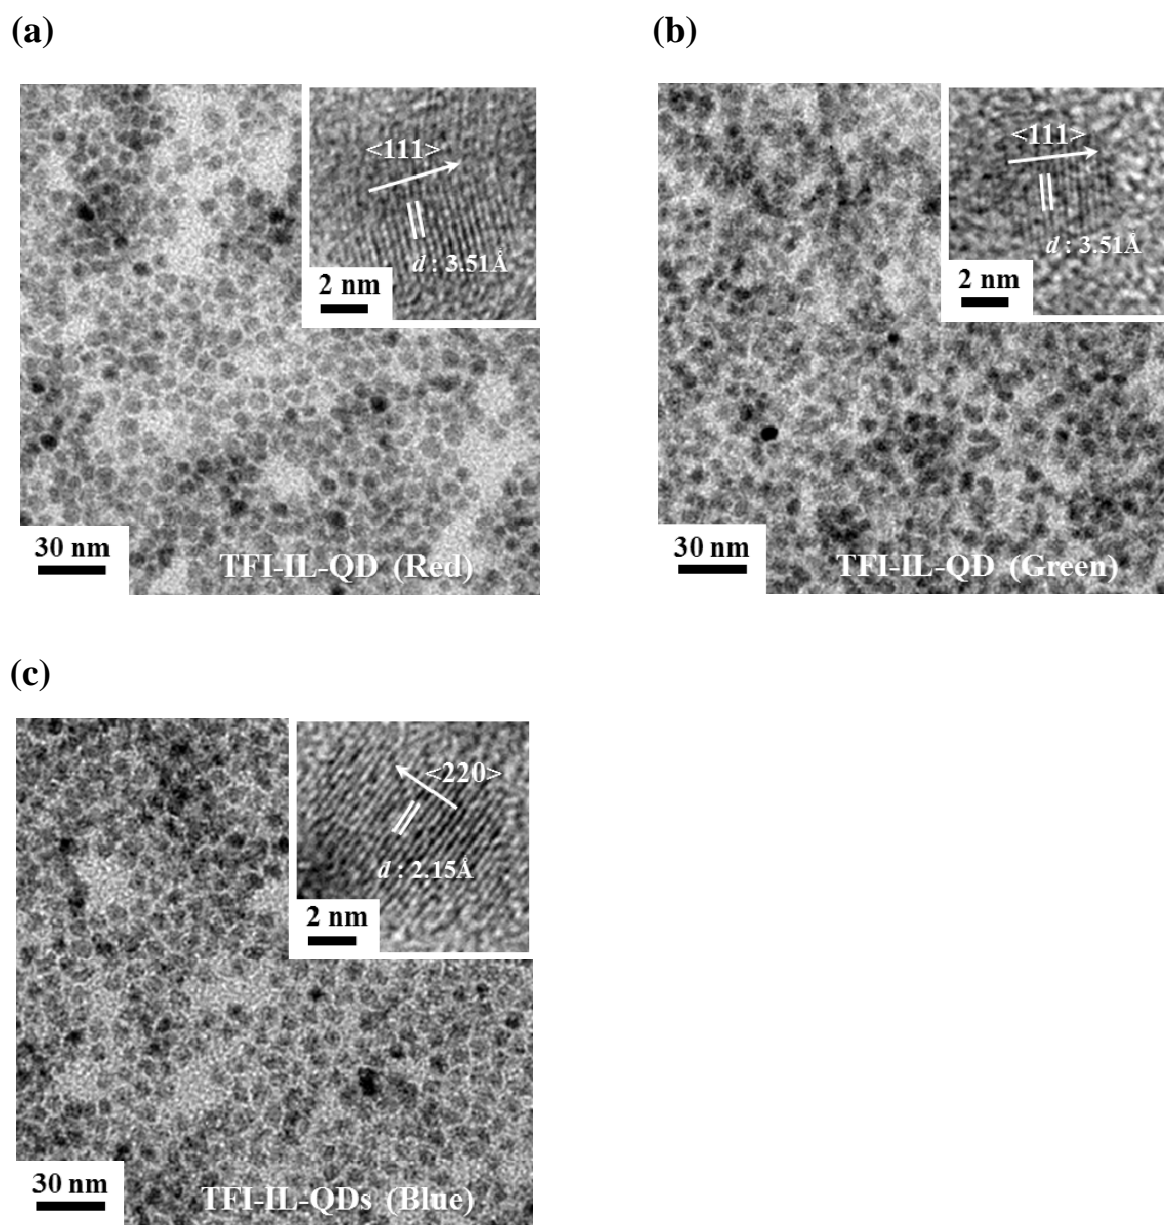

**Figure S5.** HR-TEM images of TFI-IL-CdSe@ZnS with (a) red, (b) green and (c) blue emission, respectively.

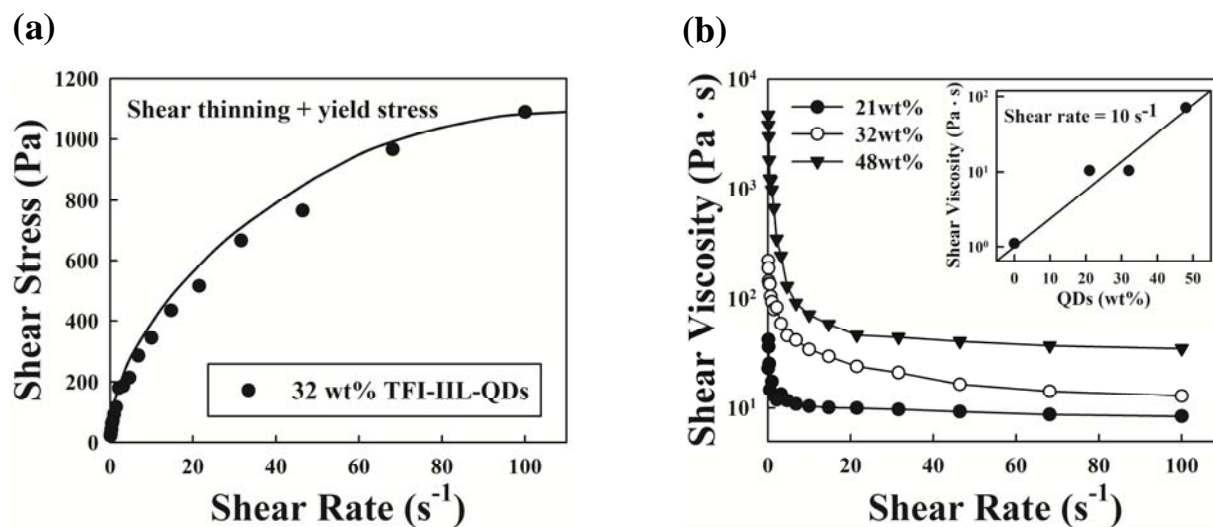

**Figure S6.** (a) Shear stress curve of 32 wt% TFI-IL-QD as a function of shear rate. (b) Shear viscosity data of TFI-IL-QDs as a function of shear rate. Inset image of (b) shows the shear viscosity of TFI-IL-QDs measured at shear rate of  $10 s^{-1}$ .

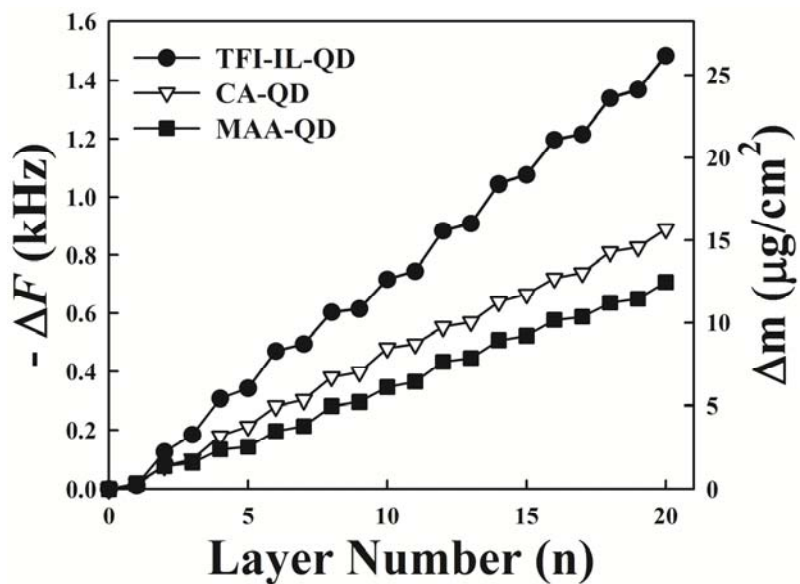

**Figure S7.** The data of QCM measurement for TFI-IL-QD/PSS, CA-QD/PSS and poly(allylamine hydrochloride)/MAA-QD multilayer films.

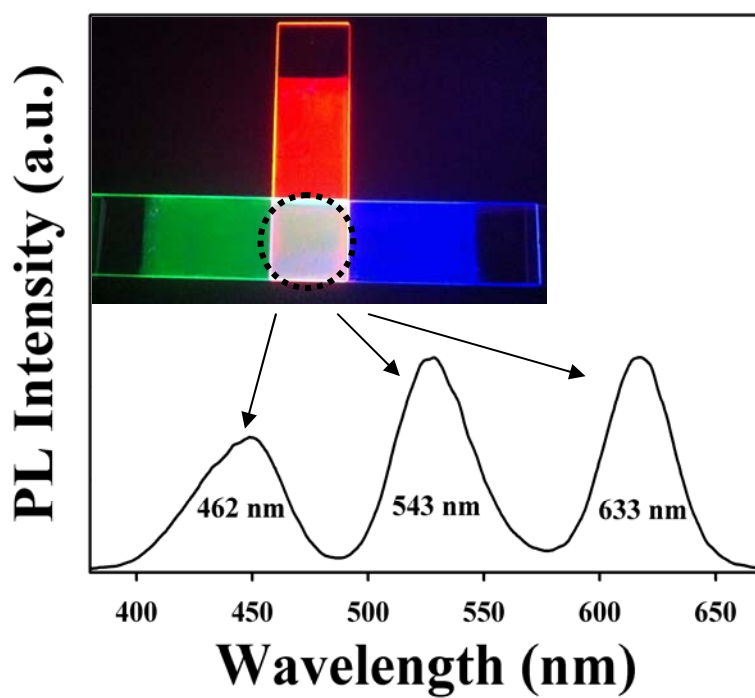

**Figure S8.** PL spectrum and photographic image for TFI-IL-QD multilayer films. Blue, green, and red emissive multilayer-coated glasses were overlapped for white color emission.
